1 **Article type:** Rapid Communication

2 **Title:** Monkeypox virus contamination in an office-based workplace environment, England  
3 2022.

4 **Authors:** Barry Atkinson<sup>1\*</sup>, Susan Gould<sup>2\*</sup>, Antony Spencer<sup>1</sup>, Okechukwu Onianwa<sup>1</sup>, Jenna  
5 Furneaux<sup>3</sup>, James Grieves<sup>1</sup>, Sian Summers<sup>4</sup>, Tim Crocker-Buqué<sup>5</sup>, Tom Fletcher<sup>2</sup>, Allan M  
6 Bennett<sup>1</sup> and Jake Dunning<sup>6</sup>.

7 **Affiliated addresses:**

8 <sup>1</sup>Research and Evaluation, UK Health Security Agency, Porton Down, Salisbury, UK.

9 <sup>2</sup>Department of Clinical Sciences, Liverpool School of Tropical Medicine, Liverpool, UK.

10 <sup>3</sup>Rare and Imported Pathogens Laboratory, UK Health Security Agency, Porton Down,  
11 Salisbury, UK.

12 <sup>4</sup>High Containment Microbiology, UK Health Security Agency, Porton Down, Salisbury, UK.

13 <sup>5</sup>Faculty of Public Health and Policy, London School Hygiene and Tropical Medicine, London,  
14 UK.

15 <sup>6</sup>NIHR Health Protection Research Unit in Emerging and Zoonotic Infections, Pandemic  
16 Sciences Institute, University of Oxford, Oxford, UK.

17 \* These authors contributed equally to this work and share first authorship.

18 **Correspondence:** Barry Atkinson ([barry.atkinson@ukhsa.gov.uk](mailto:barry.atkinson@ukhsa.gov.uk)).

19 **Key words:** Monkeypox; Monkeypox virus; Sampling Studies; Communicable Diseases,  
20 Imported; Communicable Diseases, Emerging.

21

22 **Statements**

23 Funding: This work was funded by UKHSA Grant in Aid funding and the NIHR Health  
24 Protection Research Unit in Emerging and Zoonotic Infections. The funding source had no  
25 involvement in study design; in the collection, analysis and interpretation of data; in the  
26 writing of the report; or in the decision to submit the article for publication. JD is supported  
27 by the Moh Foundation.

28 Competing interests: None declared.

29 Ethical approval: The investigations performed were a component of the urgent public  
30 health investigation performed as part of UKHSA's public health incident response to cases  
31 of a high consequence infectious disease in the UK. UKHSA is the national health security  
32 agency for England and an executive agency of the UK Government's Department of Health  
33 and Social Care. The study protocol was subject to internal review by the Research Ethics  
34 and Governance Group, which is the UKHSA Research Ethics Committee, and was granted  
35 full approval.

36 **Word Count: Abstract = 49; Text = 995**

37 **Abstract**

38 In May 2022, an office worker attended their place of work while experiencing prodromal  
39 symptoms of monkeypox infection. Environmental sampling performed four days later  
40 identified only low levels of monkeypox virus DNA contamination of the worker's desk, and  
41 no contamination elsewhere within the office. Replication-competent virus was not  
42 identified.

43

44 **[Untitled Introduction]**

45 More than 16,000 cases of monkeypox have been reported globally in 2022, predominately  
46 in non-endemic countries (1). Although transmission in the current outbreak is typically via  
47 prolonged direct contact with confirmed cases (2), infection-competent monkeypox virus  
48 (MPXV) has been recovered from contaminated environments multiple days after last  
49 occupancy (3) raising the potential for fomite transmission. In addition, prolonged close  
50 contact such as working in an open-plan office could result in respiratory droplet  
51 transmission of MPXV (4,5).

52

53 **Sampling Location**

54 In May 2022, an individual working in a non-clinical role in an administrative office within a  
55 hospital acquired MPXV infection following non-occupational exposure. The individual  
56 worked in a 15-desk open-plan office for one working day following onset of a mild,  
57 influenza-like illness, and took steps to reduce mixing and avoid close contact with others.

58 Several COVID-19 control measures were still implemented within this office including a  
59 requirement to wear medical masks and regular hand hygiene. In addition, this office had  
60 permanent partitions between desk spaces, approximately 1.2 metres high. The individual  
61 reported that monkeypox skin lesions appeared two days after taking sickness absence and  
62 at that point the office was closed to all staff, pending a risk assessment and risk  
63 management plan. 17 staff contacts were identified, including six category 2 and four  
64 category 1 contacts according to UKHSA contact categorisation (6); four of these individuals  
65 accepted post-exposure prophylaxis with Imvanex<sup>®</sup> vaccine when it was offered according  
66 to UKHSA guidelines. No contacts developed symptoms consistent with monkeypox during  
67 their 21-day monitoring periods.

68 A decision was made to perform cleaning and decontamination of the office given its  
69 location within a healthcare facility and due to the environmental stability of orthopox  
70 viruses. This was performed by professional decontamination staff following a protocol used  
71 during previous monkeypox outbreaks (7). All papers, disposable items, and anything that  
72 could not be decontaminated per protocol were removed as waste. Surface activator was  
73 applied to all hard surfaces followed by 1000ppm hypochlorite solution that was allowed to  
74 air dry. Soft surfaces were decontaminated by mechanical vacuuming with HEPA filtration,  
75 followed by steam cleaning. The hospital performed a final decontamination of the office  
76 using hydrogen peroxide vapour (Bioquell BQ-50 with 35% hydrogen peroxide solution).

77

78 **Environmental Sampling**

79 Prior to decontamination, environmental sampling was performed to identify MPXV  
80 contamination. Sampling was performed four days after the case was last in the office and  
81 two days after the office was closed to all staff. Surface samples were collected from non-  
82 porous surfaces such as desks and telephones using Copan UTM® swabs, and from porous  
83 surfaces such as carpets and chair seats using the Sartorius MD8 Airport with gelatine filters.  
84 In addition, SKC wearable samplers were utilised during the sample collection process to  
85 measure any re-aerosolisation of MPXV. All samples were processed as previously described  
86 (8) and analysed for the presence of MPXV DNA using rRT-PCR as previously reported (3,9).

87

#### 88 **Monkeypox Virus Contamination**

89 Only 3/34 surface samples were positive for the presence of MPXV DNA with all positive  
90 samples returning crossing threshold (Ct) values above 34 cycles indicating low-level  
91 contamination (Figure 1). All three positive samples were from the case's desk area  
92 including their telephone (Ct 37.7), keyboard (Ct 36.9) and a 10x10cm area of their desk (Ct  
93 34.3). Five other surface samples collected from the case's desk were negative for MPXV  
94 DNA including chair armrest, desk partition and computer mouse, as were 26 surface  
95 samples collected from other desks and high-touch areas throughout the office. All non-  
96 porous samples were negative for MPXV DNA, as were both wearable air samples.

97 Virus isolation was attempted on the Ct 34.3 positive desk sample using a previously  
98 described method (8); no evidence of replicating virus or cytopathic effect was observed  
99 after 10 days of monitoring.

100

## 101 **Conclusions**

102 Environmental sampling performed in an open-plan office that had been occupied by a  
103 person with monkeypox during their first 24 hours of illness identified low-level MPXV DNA  
104 contamination localised to their immediate desk area. Attempts to isolate virus from the  
105 most positive sample (Ct 34.4) were unsuccessful, suggesting the absence of replication-  
106 competent virus. As sampling was performed four days after occupancy by the infected  
107 individual, it is possible that some level of DNA or viral degradation occurred prior to  
108 sampling, although the office was windowless (minimising UV light degradation), the office  
109 was not cleaned prior to sampling, and MPXV is known to be environmentally stable.

110 It is notable that the patient reported their skin lesions only emerged after they had taken  
111 leave from work due to illness, raising the possibility that the MPXV DNA detected on their  
112 desk may have come from respiratory secretions through droplets or contaminated hands. If  
113 so, and while we do not know the amount of time that the individual's medical mask  
114 remained in place, it is possible that the use of the medical mask may have reduced  
115 environmental contamination by respiratory droplets containing virus. Unfortunately, the  
116 individual's disposable medical mask was not retained and therefore could not be tested for  
117 the presence of MPXV DNA.

118 Although this office may be similar to other offices in design, our findings should be seen as  
119 context-specific, including the fact that the individual worked only during the early  
120 'prodromal' phase of their monkeypox illness, several COVID-19 measures were still in place  
121 including a requirement to wear medical masks, and physical partitions were present  
122 between desk spaces. The limited detection of MPXV DNA and absence of secondary cases  
123 do not demonstrate that cleaning is unnecessary in an office where an infected person has

124 worked, or that focussed cleaning of an infected person’s desk area is all that is required. In  
125 the absence of reliable, real-time environmental sampling to inform decontamination, and  
126 the fact that the office was within a hospital, our detection of environmental MPXV DNA  
127 supports the decision made to remediate the entire office. These data confirm that MPXV  
128 contamination can occur in workplace environments occupied by a person with early  
129 monkeypox illness and, accordingly, appropriate cleaning and decontamination measures  
130 should be considered in such situations.

131

### 132 **Acknowledgments**

133 The authors wish to acknowledge Ambipar Response Ltd for providing information on their  
134 decontamination process.

135

### 136 **Authors’ contributions:**

137 Conceptualisation and methodology: BA, SG, TF, AMB and JD.

138 Investigation: BA, SG, T-CB and JD.

139 Formal analysis: BA, AS, OO, JF, JG and SS.

140 Writing – original draft: BA, SG, TF, AMB and JD.

141 Writing – review and editing: All authors.

142

### 143 **Disclosure Statement**

144 This report contains work supported by UKHSA Grant-in-Aid. The contents of this paper,  
145 including any opinions and/or conclusions expressed, are those of the authors alone and do  
146 not necessarily reflect UK Health Security Agency policy.

147

#### 148 **Figure legend**

149 **Figure 1:** Diagrammatic representation of the office environment associated with a  
150 confirmed case of monkeypox. Blue lines represent permanent office structures such as  
151 walls and office door; purple lines represent desk partitions (wooden partitions  
152 approximately 1.2 metres high enclosing work desks). Ct = crossing threshold value of MPXV  
153 DNA detected in sample.

154



## 155   **References**

- 156   1. WHO. Multi-country outbreak of monkeypox, External situation report #2 - 25 July 2022  
157    [Internet]. 2022 [cited 2022 Jul 26]. Available from:  
158    [https://www.who.int/publications/m/item/multi-country-outbreak-of-monkeypox--](https://www.who.int/publications/m/item/multi-country-outbreak-of-monkeypox--external-situation-report--2---25-july-2022)  
159    [external-situation-report--2---25-july-2022](https://www.who.int/publications/m/item/multi-country-outbreak-of-monkeypox--external-situation-report--2---25-july-2022)
- 160   2. Cohen. Monkeypox outbreak questions intensify as cases soar | Science | AAAS  
161    [Internet]. 2022 [cited 2022 Jun 1]. Available from:  
162    [https://www.science.org/content/article/monkeypox-outbreak-questions-intensify-](https://www.science.org/content/article/monkeypox-outbreak-questions-intensify-cases-soar)  
163    [cases-soar](https://www.science.org/content/article/monkeypox-outbreak-questions-intensify-cases-soar)
- 164   3. Atkinson B, Burton C, Pottage T, Thompson K-A, Ngabo D, Crook A, et al. Infection-  
165    competent monkeypox virus contamination identified in domestic settings following an  
166    imported case of monkeypox into the UK. *Environ Microbiol*. 2022 Jul 15;
- 167   4. Ježek Z, Grab B, Szczeniowski MV, Paluku KM, Mutombo M. Human monkeypox:  
168    secondary attack rates. *Bull World Health Organ*. 1988;66(4):465–70.
- 169   5. Hutson CL, Carroll DS, Gallardo-Romero N, Weiss S, Clemmons C, Hughes CM, et al.  
170    Monkeypox disease transmission in an experimental setting: prairie dog animal model.  
171    *PLoS One*. 2011;6(12):e28295.
- 172   6. UKHSA. Monkeypox: contact tracing [Internet]. GOV.UK. [cited 2022 Jul 26]. Available  
173    from: <https://www.gov.uk/government/publications/monkeypox-contact-tracing>
- 174   7. Public Health England. Monkeypox: Guidance for environmental cleaning and  
175    decontamination - version 4.  
176    [https://assets.publishing.service.gov.uk/government/uploads/system/uploads/attachm](https://assets.publishing.service.gov.uk/government/uploads/system/uploads/attachment_data/file/746086/Monkeypox_Guidance__cleaning_decontamination.pdf)  
177    [ent\\_data/file/746086/Monkeypox\\_Guidance\\_\\_cleaning\\_decontamination.pdf](https://assets.publishing.service.gov.uk/government/uploads/system/uploads/attachment_data/file/746086/Monkeypox_Guidance__cleaning_decontamination.pdf)  
178    [Internet]. Public Health England; 2018. Available from:  
179    [https://assets.publishing.service.gov.uk/government/uploads/system/uploads/attachm](https://assets.publishing.service.gov.uk/government/uploads/system/uploads/attachment_data/file/746086/Monkeypox_Guidance__cleaning_decontamination.pdf)  
180    [ent\\_data/file/746086/Monkeypox\\_Guidance\\_\\_cleaning\\_decontamination.pdf](https://assets.publishing.service.gov.uk/government/uploads/system/uploads/attachment_data/file/746086/Monkeypox_Guidance__cleaning_decontamination.pdf)
- 181   8. Gould S, Atkinson B, Onianwa O, Spencer A, Furneaux J, Grieves J, et al. Air and surface  
182    sampling for monkeypox virus in UK hospitals. *medRxiv*. 2022 Jul  
183    21;2022.07.21.22277864.
- 184   9. Li Y, Zhao H, Wilkins K, Hughes C, Damon IK. Real-time PCR assays for the specific  
185    detection of monkeypox virus West African and Congo Basin strain DNA. *J Virol*  
186    *Methods*. 2010 Oct;169(1):223–7.

187

188

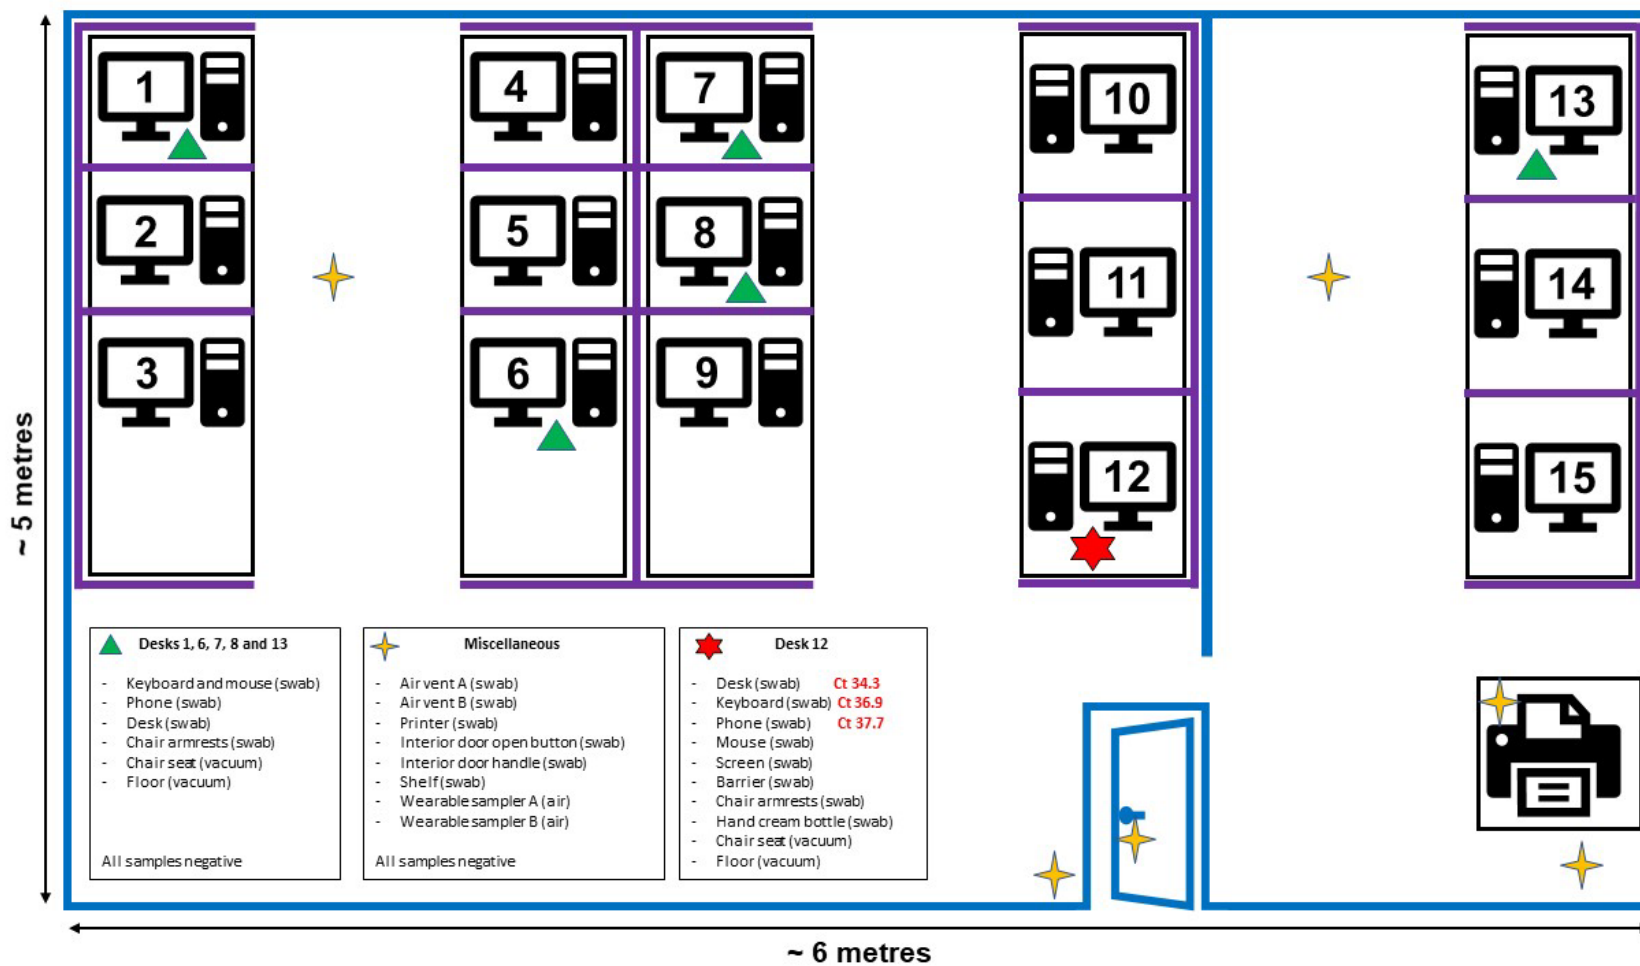

Source: https://www.medrxiv.org/content/10.1101/2022.08.09.22278460.full.pdf
